# Supplementary material for: Loss of function mutations in PTPN6 promote STAT3 deregulation via JAK3 kinase in diffuse large B-cell lymphoma
Source: PubMed Central journal article supplement (PMC4792586; doi:10.18632/oncotarget.6300), 2015-11-09
Supplement: oncotarget-06-44703-s001.pdf [file oncotarget-06-44703-s001.pdf]

# Loss -of- function mutations in PTPN6 promote STAT3 deregulation via JAK3 kinase in diffuse large B-cell lymphoma

## Supplementary Material

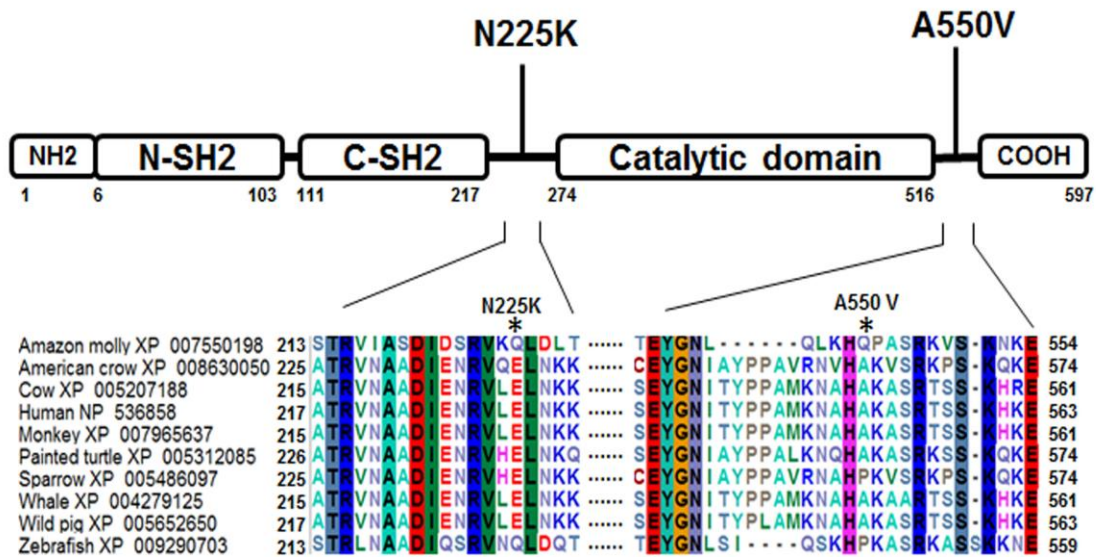

**Supplemental figure 1:** Modular structure of PTPN6 showing the N225K and A550V mutations. Alignment of part of PTPN6 protein sequence from various species shows that Asparagine 225 and Alanine 550 are non-conserved amino acids.
